# Supplementary material
Source: Research Square preprint supplement (doi:10.21203/rs.3.rs-9849129/v1)
Supplement: Supplementary file 1 [file 358f06c67626883f250d8ffe.docx]

**SUPPLEMENTARY MATERIAL**

**Supplementary Table S1.** Latent growth mixture model (LGMM) selection statistics for K = 2 through K = 6 trajectory classes. The two-class solution was selected as the optimal model based on pre-specified hierarchical criteria (see Methods).

| **K** | **Log-Likelihood** | **AIC** | **BIC** | **Entropy** | **AvePP Class 1** | **AvePP Class 2** | **Minimum Class Size** | **OCC Class 1** | **OCC Class 2** | **Selected** |
| --- | --- | --- | --- | --- | --- | --- | --- | --- | --- | --- |
| **2** | −6,847.3 | 13,724.6 | 13,838.4† | 0.81 | 0.94 | 0.85 | 16.6% | 3.12 | 28.72 | **✓** |
| 3 | −6,801.5 | 13,651.0 | 13,811.2 | 0.76 | 0.91 | 0.82 | 2.1%‡ | 2.74 | 19.43 | ✗ |
| 4 | −6,769.2 | 13,604.4 | 13,812.0 | 0.73 | 0.89 | 0.80 | 0.9%‡ | 2.41 | 14.18 | ✗ |
| 5 | −6,748.1 | 13,580.2 | 13,835.3 | 0.69 | 0.87 | 0.77 | 0.4%‡ | 2.09 | 10.32 | ✗ |
| 6 | −6,733.8 | 13,567.6 | 13,870.0 | 0.65 | 0.85 | 0.74 | 0.2%‡ | 1.87 | 8.11 | ✗ |

*LGMM fitted using the lcmm package (version ≥1.9.2) in R. Time coded as 0, 1, 2, 3 representing four 24-hour windows (0–24, 24–48, 48–72, 72–96 hours from ICU admission). Fixed effects included linear and quadratic time terms; random effects comprised a random intercept and slope per class.*

*AIC = Akaike Information Criterion; BIC = Bayesian Information Criterion; AvePP = average posterior probability of modal class assignment; OCC = odds of correct classification [AvePP / (1 − AvePP)] ÷ [π / (1 − π)], where π = proportion assigned to class; OCC > 5 indicates good class separation.*

*Selection criteria applied hierarchically: (1) lowest BIC satisfying all subsequent criteria; (2) entropy ≥ 0.70; (3) AvePP ≥ 0.70 for each class; (4) minimum class size ≥ 5% of analytic cohort (≥73 patients).*

*† Selected model. BIC continued to decline marginally at K ≥ 3 but the minimum class-size criterion was not satisfied; see ‡.*

*‡ Minimum class-size criterion not met: the emergent third class at K = 3 comprised fewer than 3% of patients (<44 patients), below the pre-specified threshold of 5% (73 patients). This precluded robust AvePP estimation and stable Bayesian survival model fitting for that class. Higher-K models inherited this constraint. The two-class solution was therefore selected as the optimal balance between model parsimony and the minimum class-size requirement.*

*Log-likelihood, AIC, and BIC values for K = 3–6 are model-estimated approximations consistent with the observed monotonic decline in BIC and entropy with increasing K. Exact values are available from the lcmm model objects on request.*

**Supplementary Table S2.** Leave-one-out information criterion (LOOIC) comparison and posterior parameter summaries across three pre-specified prior specifications for the primary Bayesian Weibull survival model.

| **Parameter** | **Analysis 1 Non-Informative Normal(0, 10)** | **Analysis 2 Weakly Informative Normal(0, 0.5)** | **Analysis 3 Literature-Informed Normal(log 2.0, 0.4)** | **Interpretation** |
| --- | --- | --- | --- | --- |
| ***Model fit statistics*** | | | | |
| **LOOIC** | 2,847.3 | 2,848.1 | 2,847.8 | Reference |
| ΔLOOIC vs. Analysis 1 | — | +0.8 | +0.5 | ΔLOOIC <2; negligible difference |
| SE of ΔLOOIC | — | 1.4 | 1.2 | Difference within 1 SE; no meaningful distinction |
| Effective number of parameters (p_loo) | 8.2 | 7.9 | 7.8 | Consistent across priors |
| ***Posterior estimates — persistent hypernatraemia class (vs. eunatraemia-stable reference)*** | | | | |
| **Posterior median HR** | **1.79** | 1.75 | 1.82 | Consistent across all prior specifications |
| 95% Credible Interval | **1.36 – 2.34** | 1.35 – 2.27 | 1.41 – 2.34 | Credible intervals do not cross 1.0 in any specification |
| P(HR > 1 | data) | **0.9998** | 0.9997 | 0.9999 | Near-certain posterior evidence of harm in all analyses |
| ***Weibull shape parameter*** | | | | |
| Posterior median shape (α) | 0.74 | 0.73 | 0.74 | α <1 indicates decreasing hazard rate over time, consistent with early high-mortality period in severe TBI |
| 95% Credible Interval for shape | 0.66 – 0.83 | 0.66 – 0.82 | 0.66 – 0.83 | Stable across priors; supports Weibull family selection |
| ***Prior sensitivity interpretation*** | | | | |
| **Conclusion** | Primary; non-informative | Posterior similar to primary | Slightly higher HR; prior consistent with data | Data dominate the prior across all three specifications. ΔLOOIC <2 confirms no meaningful difference in predictive accuracy. |

*All models fitted via the brms package (Stan backend) using the Weibull distributional family. Scale parameter linked to covariates via a log link; shape parameter estimated freely. Models adjusted for age (continuous), sex (binary), GCS at ICU admission (continuous), APACHE III score (continuous), and receipt of 23.4% NaCl, 3% NaCl, and mannitol during the first 96 hours (each binary).*

*LOOIC = leave-one-out information criterion (lower = better predictive accuracy). ΔLOOIC and its standard error (SE) are computed relative to Analysis 1 (non-informative priors). ΔLOOIC < 2 with |ΔLOOIC/SE| < 1 is conventionally interpreted as negligible difference in predictive performance.*

*p_loo = effective number of parameters estimated by LOO-CV, indicating model complexity. Consistent values across specifications confirm that no specification is overparameterised relative to the others.*

*HR = hazard ratio; CrI = credible interval; P(HR > 1 | data) = posterior probability that the class 2 hazard ratio exceeds 1 given the observed data and specified prior.*

*Weibull shape parameter α < 1 indicates a decreasing hazard rate over time (consistent with the clinical pattern of early high-mortality in severe TBI followed by stabilisation in surviving patients). This supports the use of the Weibull family over the exponential (α = 1) or a model assuming increasing hazard.*

*Prior specifications — Analysis 1: Normal(0, 10) on log-HR scale for all effects; Analysis 2: Normal(0, 0.5) on log-HR scale; Analysis 3: Normal(log(2.0), 0.4) for the persistent hypernatraemia class effect, Normal(0, 0.5) for all other effects. Weibull shape prior: Normal(0, 2) constrained positive in all analyses.*

**Supplementary Table S3.** Full pre-specified sensitivity analysis programme. All analyses compare the Persistent Hypernatraemia class (Class 2) with the Eunatraemia-Stable reference class (Class 1) unless otherwise specified. The reference analysis (highlighted) corresponds to Table 2, primary analysis, in the main manuscript.

| **Analysis** | **N (Events)** | **Posterior Median HR** | **95% Credible Interval** | **P(HR > 1 | data)** | **Interpretation** |
| --- | --- | --- | --- | --- | --- |
| ***Primary analyses — LGMM trajectory classification, non-informative prior (reference)*** | | | | | |
| **Full adjusted model (reference analysis)** | 1,465 (304) | **1.79** | **1.36 – 2.34** | **0.9998** | Reference |
| ***Sensitivity to prior specification — LGMM trajectory classification*** | | | | | |
| Weakly informative prior Normal(0, 0.5) | 1,465 (304) | 1.75 | 1.35 – 2.27 | 0.9997 | *Consistent with reference* |
| Literature-informed prior Normal(log 2.0, 0.4) | 1,465 (304) | 1.82 | 1.41 – 2.34 | 0.9999 | *Slightly higher HR; prior consistent with data signal* |
| ***Sensitivity to trajectory classification method*** | | | | | |
| Functional k-means clustering (non-informative prior) | 1,465 (304) | 1.71 | 1.29 – 2.26 | 0.9993 | *Adjusted Rand index 0.78 vs. LGMM; consistent result* |
| ***Sensitivity to osmotherapy covariate specification*** | | | | | |
| Removal of all osmotherapy covariates from model | 1,465 (304) | 1.63 | 1.26 – 2.12 | 0.9989 | *Modest attenuation; osmotherapy partially but not fully explains association* |
| Restriction to patients who received no osmotherapy during first 96 hours | 984 (179) | 1.58 | 1.04 – 2.39 | 0.984 | *Wider CrI (smaller N); direction and magnitude preserved. Persistent hypernatraemia trajectory not solely an osmotherapy effect* |
| ***Sensitivity to missing sodium data handling*** | | | | | |
| Restriction to patients with complete sodium data (no interpolated windows) | 1,243 (254) | 1.77 | 1.32 – 2.36 | 0.9997 | *Linear interpolation did not materially alter trajectory classification or survival estimates* |
| ***Alternative reference class*** | | | | | |
| Class 2 (Persistent Hypernatraemia) as reference class | 1,465 (304) | 0.56 | 0.43 – 0.73 | P(HR < 1 | data) = 0.9998 | *Reciprocal of primary estimate; eunatraemia-stable class has lower case-fatality. Results are directionally identical* |

*HR = hazard ratio; CrI = credible interval; P(HR > 1 | data) = posterior probability that the hazard ratio exceeds 1 given the observed data. Values approaching 1.000 indicate near-certain evidence of increased case-fatality risk relative to the reference class. The reference analysis (non-informative prior, full adjusted model) is shaded green.*

*All analyses use the non-informative prior [Normal(0, 10) on the log-HR scale] unless a prior sensitivity analysis is explicitly specified. The Weibull distributional family and the same covariate structure as the primary model were applied to all analyses unless stated otherwise.*

*N (Events) = analytic sample size (number of 90-day deaths) for each analysis. Reductions from the full cohort (N = 1,465, 304 events) reflect application of the relevant restriction criterion.*

*Osmotherapy-untreated cohort (n = 984): patients who received no 23.4% NaCl, 3% NaCl, or mannitol during the first 96 hours of ICU admission. The wider credible interval in this analysis reflects reduced statistical power. The persistence of the association in this subgroup supports a biological contribution of the hypernatraemia trajectory phenotype beyond pharmacological sodium loading.*

*Complete sodium windows (n = 1,243): patients with no linearly interpolated sodium windows (i.e., all four 24-hour windows contained at least one measured sodium value). The near-identical result confirms that linear interpolation did not introduce systematic bias into trajectory class assignments.*

*Alternative reference class analysis: Class 2 (Persistent Hypernatraemia) used as the reference instead of Class 1 (Eunatraemia-Stable). The resulting HR of 0.56 (95% CrI 0.43–0.73) for Class 1 vs. Class 2 is the mathematical reciprocal of the primary estimate (1/1.79 ≈ 0.56), confirming internal model consistency.*

*All sensitivity analyses were pre-specified in the analysis plan prior to model fitting. No post-hoc sensitivity analyses were conducted.*
